# Supplementary material for: Molecular Epidemiology of Streptococcus pneumoniae Detected in Hospitalized Pediatric Acute Respiratory Infection Cases in Central Vietnam
Source: MDPI journal article supplement (doi:10.3390/pathogens12070943), 2023-07-17
Supplement: s1 [file s1]

# Supplementary material

Table S1: Primers used for amplification of pbp and macrolide resistance genes

| Primer name | Sequence (5'-3')                   | Base pair (bp) | References |
|-------------|------------------------------------|----------------|------------|
| LytA        | F-681 CAACCGTACAGAATGAAGCGG 701    | 319            | [1]        |
|             | R-999 TTATTCGTGCAATACTCGTGCG 978   |                | [1]        |
| Pbp1a       | F-2037 AAACCGCGACTGGGGATCAAC 2057  | 239            | [2]        |
|             | R-2275 GGTTGAGCTCGACCTTGTTT 2256   |                | This study |
| Pbp2x       | F-1255 CCAGGTCCACTATGAAAGTG 1275   | 197            | [1]        |
|             | R-1451 ATCCCAACGTTACTTGAGTGT 1431  |                | [1]        |
| Pbp2b       | F-1566 CCTA TATGGTCCAAACAGCCT 1586 | 147            | [1]        |
|             | R-1693 GGTC AATTC CTGTCCGAGTA 1712 |                | [1]        |
| MefA        | F-180 CTGTATGGAG CTACCTGTCTGG 199  | 296            | [1]        |
|             | R-581 CCCAGCTTAGGTATACGTAC 562     |                | [1]        |
| ErmB        | F-721 CGTACCTTGGATATT CACCG 740    | 224            | [1]        |
|             | R-944 GTAAACAGTTGACGATATTCT CG 922 |                | [1]        |

Table S2: Antimicrobial resistance of S.pneumoniae against antimicrobial agents in different serotypes among 401 isolates

| Serotype        | AMP <sup>1</sup> n (%) | CXM <sup>1</sup> n (%) | CAM <sup>1</sup> n (%) | ERY <sup>1</sup> n (%) | C <sup>1</sup> n (%) | TE <sup>1</sup> n (%) |
|-----------------|------------------------|------------------------|------------------------|------------------------|----------------------|-----------------------|
| 6A/B            | 144                    | 21 (14.6)              | 119 (82.6)             | 132 (91.7)             | 130 (90.3)           | 95 (66)               |
| 19F             | 95                     | 33 (34.7)              | 74 (77.9)              | 89 (93.7)              | 87 (91.6)            | 4 (4.2)               |
| 23F             | 51                     | 4 (7.8)                | 29 (56.9)              | 28 (54.9)              | 31 (60.8)            | 18 (35.3)             |
| 14              | 26                     | 6 (23.1)               | 18 (69.2)              | 26 (100)               | 25 (96.2)            | 1 (3.8)               |
| 19A             | 6                      | 0                      | 1 (16.7)               | 4 (66.7)               | 4 (66.7)             | 0                     |
| 11A/D           | 12                     | 4 (33.3)               | 10 (83.3)              | 12 (100)               | 10 (83.3)            | 0                     |
| 15B/C           | 9                      | 1 (11.1)               | 5 (55.6)               | 6 (66.7)               | 5 (55.6)             | 2 (22.2)              |
| 15A/F           | 7                      | 0                      | 0                      | 6 (85.7)               | 5 (71.4)             | 0                     |
| 16F             | 3                      | 0                      | 2 (66.7)               | 2 (66.7)               | 3 (100)              | 0                     |
| 23A             | 2                      | 0                      | 0                      | 1 (50)                 | 1 (50)               | 0                     |
| 22F/22A         | 1                      | 0                      | 1 (100)                | 1 (100)                | 1 (100)              | 0                     |
| 35B             | 1                      | 1 (100)                | 1 (100)                | 1 (100)                | 0                    | 0                     |
| NT <sup>2</sup> | 44                     | 6 (13.6)               | 27 (61.4)              | 38 (86.4)              | 37 (84.1)            | 8 (18.2)              |

<sup>1</sup>AMP: Amoxicillin, CXM: Cefuroxime, CAM: Clarithromycin, ERY: Erythromycin, C: Chloramphenicol, TE: Tetracycline, <sup>2</sup>NT: Non-typeable. Ampicillin resistance was highest in serotype 19F. While 11A/D and 6A/B showed highest resistance to Tetracycline and Chloramphenicol respectively

Table S3: Resistance genes in different serotypes among 264 isolates

| Resistance gene | 6A/B<br>n (%) | 19F<br>n (%) | 23F<br>n (%) | 14<br>n (%)  | 19A<br>n (%) | 11A/D<br>n (%) | 15B/C<br>n (%) | 15A/F<br>n (%) | 22F/A<br>n (%) | 35<br>n (%) | Non-<br>typeable<br>n (%) |
|-----------------|---------------|--------------|--------------|--------------|--------------|----------------|----------------|----------------|----------------|-------------|---------------------------|
| N               | 92            | 64           | 40           | 17           | 6            | 10             | 7              | 6              | 1              | 1           | 20                        |
| ermB            | 90<br>(97.8)  | 64<br>(100)  | 40<br>(100)  | 16<br>(94.1) | 6<br>(100)   | 10<br>(100)    | 5<br>(71.4)    | 6<br>(100)     | 1<br>(100)     | 0           | 18<br>(90)                |
| mefA            | 2<br>(2.2)    | 61<br>(95.3) | 0            | 11<br>(64.7) | 1<br>(16.7)  | 1<br>(10)      | 1<br>(14.3)    | 0              | 0              | 1<br>(100)  | 2<br>(10)                 |
| ermB+mefA       | 1 (1.1)       | 61<br>(95.3) | 0            | 10<br>(58.8) | 1<br>(16.7)  | 1<br>(10)      | 0              | 0              | 0              | 0           | 1<br>(5)                  |
| Pbp1a           | 92 (100)      | 63<br>(98.4) | 40<br>(100)  | 17<br>(100)  | 6<br>(100)   | 10<br>(100)    | 4<br>(57.1)    | 6<br>(100)     | 1<br>(100)     | 1<br>(100)  | 19<br>(95)                |
| Pbp2b           | 92 (100)      | 63<br>(98.4) | 40<br>(100)  | 17<br>(100)  | 6<br>(100)   | 10<br>(100)    | 6<br>(85.7)    | 5<br>(83.3)    | 1<br>(100)     | 1<br>(100)  | 20<br>(100)               |
| Pbp2x           | 92 (100)      | 64<br>(100)  | 40<br>(100)  | 17<br>(100)  | 6<br>(100)   | 10<br>(100)    | 6<br>(85.7)    | 6<br>(100)     | 1<br>(100)     | 1<br>(100)  | 20<br>(100)               |

Distribution of resistance genes across serotypes showed 19F having highest number of isolates having *mefA* and those having both genes *mefA* and *ermB*.

Table S4: Sequence type distribution among different serotypes in 264 isolates

| Serotypes | No. of isolates | CC/Singletons | PMEN                      | Sequence types (STs),(number)                                                                                            |
|-----------|-----------------|---------------|---------------------------|--------------------------------------------------------------------------------------------------------------------------|
| 6A/B      | 92              |               | Spain <sup>6B</sup> -2    | 13223(51),90(15),4417(5),855(4),9332(3),1624(2),8465(2),1518(2),17852(2),95(1),9650(1),17856(1),17860(1),320(1),15730(1) |
| 19F       | 64              |               | Taiwan <sup>19F</sup> -14 | 320(53),236(3),271(1),283(4),4467(1),9116(1),17846(1)                                                                    |
| 23F       | 40              |               | Spain <sup>23F</sup> -1   | 81(21),880(2),2395(4),3176(5),6796(1),9116(5),17847(1),17854(1)                                                          |
| 14        | 17              |               |                           | 320(1),448(1),782(6),17845 (9)                                                                                           |
| 19A       | 6               |               |                           | 319(4),320(1),4852(1)                                                                                                    |
| 11A/D     | 10              |               |                           | 166(7),14138(1),9116(1), 17859(1)                                                                                        |
| 15B/C     | 7               |               |                           | 83(3),1545(1),1961(1),17848(1),17857(1)                                                                                  |
| 15A/F     | 7               |               | Sweden <sup>15A</sup> -25 | 63(3),2675(2),17850(1), 17851(1)                                                                                         |
| 16F       | 3               |               |                           | 1106,448,ND*                                                                                                             |
| 22F/A     | 1               |               |                           | 8966                                                                                                                     |
| 35B       | 1               |               |                           | 558                                                                                                                      |

|              |    |                                                                                                        |
|--------------|----|--------------------------------------------------------------------------------------------------------|
| Non-typeable | 20 | 14138(1),15730(3),15923(1),17849(2), 17851(2),17852(4),<br>17853(1), 17855(1),17859(1),17860(2),ND*(2) |
|--------------|----|--------------------------------------------------------------------------------------------------------|

\*ND: Not determined due high nucleotide difference in PUBMLST blast search. The distribution of different STs in serotypes detected. Non-typeables contributed the most (13 isolates) to the new STs found in the study

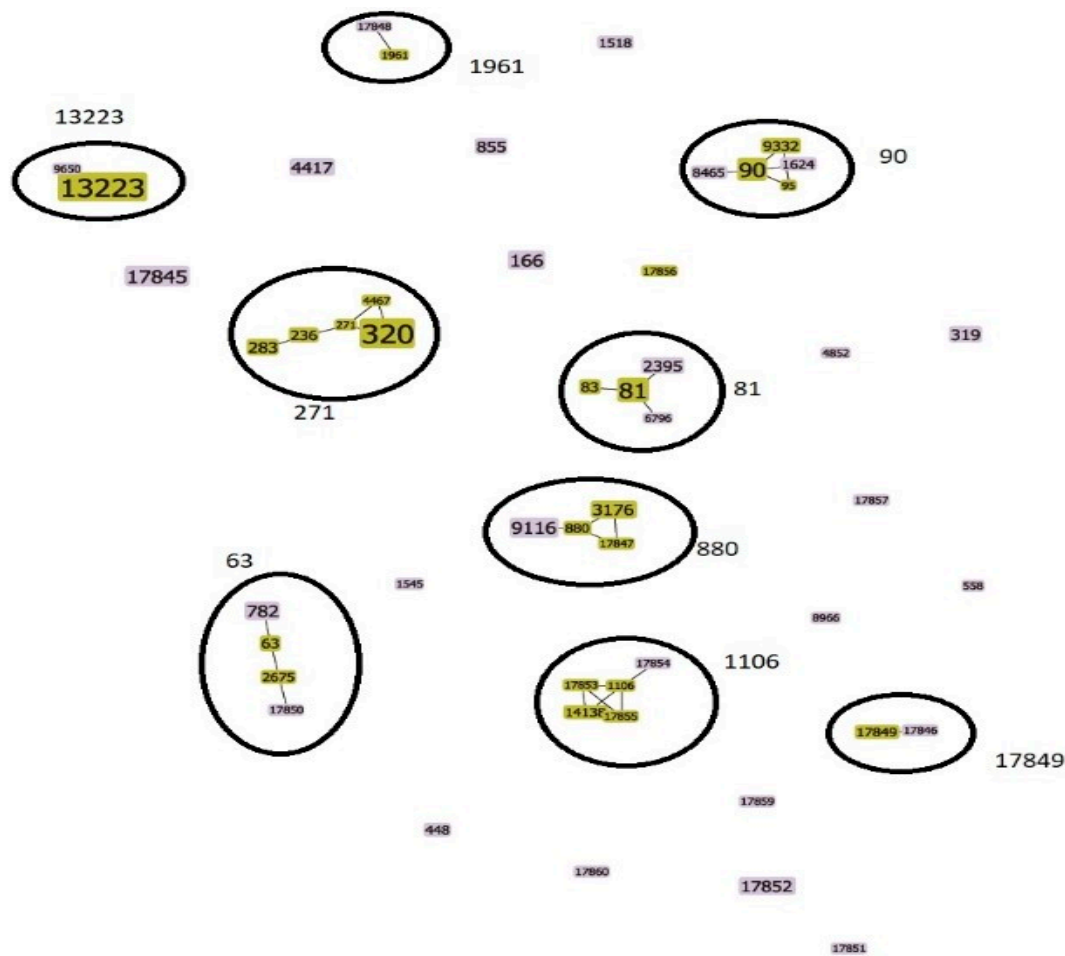

Figure S1: Population snapshot of 264 *S.pneumoniae* isolates

Clusters linked isolates correspond to clonal complexes (CC), CCs are named after predominant ST, and where there is equal distribution of STs in the CC, it is named either isolated ST, STs sharing six (single locus variants- SLVs) were assigned to the same CC, STs not assigned to any CC were designated as singletons

## References

1. Nagai, K.; Shibasaki, Y.; Hasegawa, K.; Davies, T.A.; Jacobs, M.R.; Ubukata, K.; Appelbaum, P.C. Evaluation of PCR Primers to Screen for *Streptococcus Pneumoniae* Isolates and  $\beta$ -Lactam Resistance, and to Detect Common Macrolide Resistance Determinants. *J. Antimicrob. Chemother.* **2001**, *48*, 915–918, doi:10.1093/jac/48.6.915.
2. Ubukata, K.; Chiba, N.; Hasegawa, K.; Kobayashi, R.; Iwata, S.; Sunakawa, K. Antibiotic Susceptibility in Relation to Penicillin-Binding Protein Genes and Serotype Distribution of *Streptococcus Pneumoniae* Strains Responsible for Meningitis in Japan, 1999 to 2002. *Antimicrob. Agents Chemother.* **2004**, *48*, 1488–1494, doi:10.1128/AAC.48.5.1488-1494.2004.
